# Supplementary material
Source: publisher site journal article supplement (https://www.dovepress.com/article/407838)
Supplement: Supplementary file 1 [file get_supplementary_file.php]

***RESULTS***

**Additional information for MTT Cytotoxicity**

Table S1. MTT Cytotoxicity results

| **Material** | **Percent Viability [%]** | **Standard Deviation [%]** | **System Suitability** |
| --- | --- | --- | --- |
| **4SEAL®** | | | |
| Positive control | 2.18 | 0.36 | Valid |
| Negative control | 118.72 | 3.30 | Valid |
| Dilution 1x | 99.55 | 4.05 | no cytotoxic potential |
| Dilution 2x | 101.94 | 3.31 | no cytotoxic potential |
| Dilution 3x | 101.25 | 1.86 | no cytotoxic potential |
| Dilution 4x | 96.13 | 7.42 | no cytotoxic potential |
| **Starsil®** | | | |
| Positive control | 2.42 | 1.58 | Valid |
| Negative control | 96.03 | 3.22 | Valid |
| Dilution 1x | 103.05 | 3.13 | no cytotoxic potential |
| Dilution 2x | 119.48 | 8.35 | no cytotoxic potential |
| Dilution 3x | 114.17 | 5.10 | no cytotoxic potential |
| Dilution 4x | 109.67 | 2.63 | no cytotoxic potential |
| **PerClot®** | | | |
| Positive control | 0.81 | 0.06 | Valid |
| Negative control | 91.69 | 4.80 | Valid |
| Dilution 1x | 68.47 | 1.76 | cytotoxic potential |
| Dilution 2x | 82.81 | 1.45 | no cytotoxic potential |
| Dilution 3x | 86.53 | 2.39 | no cytotoxic potential |
| Dilution 4x | 88.64 | 2.33 | no cytotoxic potential |
| **ARISTA™** | | | |
| Positive control | 0.81 | 0.06 | Valid |
| Negative control | 91.69 | 4.80 | Valid |
| Dilution 1x | 67.29 | 0.78 | cytotoxic potential |
| Dilution 2x | 89.07 | 2.65 | no cytotoxic potential |
| Dilution 3x | 98.66 | 2.66 | no cytotoxic potential |
| Dilution 4x | 101.99 | 4.39 | no cytotoxic potential |
| **SuperClot®** | | | |
| Positive control | 0.81 | 0.06 | Valid |
| Negative control | 91.69 | 4.80 | Valid |
| Dilution 1x | 56.06 | 1.36 | cytotoxic potential |
| Dilution 2x | 84.17 | 2.53 | no cytotoxic potential |
| Dilution 3x | 85.41 | 2.28 | no cytotoxic potential |
| Dilution 4x | 87.89 | 2.97 | no cytotoxic potential |
| **4DryField®** | | | |
| Positive control | 2.42 | 1.58 | Valid |
| Negative control | 96.03 | 3.22 | Valid |
| Dilution 1x | 72.60 | 6.74 | no cytotoxic potential |
| Dilution 2x | 95.52 | 0.79 | no cytotoxic potential |
| Dilution 3x | 95.93 | 0.98 | no cytotoxic potential |
| Dilution 4x | 94.54 | 1.30 | no cytotoxic potential |
|  |  |  |  |
| **Quality check of assay** | **Result** | | **System Suitability** |
| Absolute value of optical density (OD570) | 0.34 | | Valid |
| Systematic cell seeding errors | 1.36 % | | Valid |

**Additional information for Water Absorption Capacity (WAC)**

Table S2. Results of water absorption capacity (WAC) for 0.5 g of hemostatic powders

| **Specimen** | **Water Absorption Capacity (WAC) [mL]** | | | | | |
| --- | --- | --- | --- | --- | --- | --- |
| **4SEAL®** | **Starsil®** | **PerClot®** | **ARISTA™** | **SuperClot®** | **4DryField®** |
| 1 | 22.206 | 20.137 | 19.984 | 7.550 | 6.227 | 17.488 |
| 2 | 22.342 | 17.535 | 19.846 | 8.789 | 6.381 | 18.517 |
| 3 | 22.819 | 17.831 | 19.787 | 9.776 | 6.782 | 18.019 |
| Mean | 22.456 | 18.501 | 19.872 | 8.705 | 6.463 | 18.008 |
| Standard Deviation | 0.322 | 1.425 | 0.101 | 1.115 | 0.287 | 0.515 |

Table S3. Result of one-way ANOVA with Bonferroni's multiple comparisons test for Water Absorption Capacity (WAC)

| **Bonferroni's multiple comparisons test** | **Mean Diff.** | **Summary** | **Adjusted P Value** |
| --- | --- | --- | --- |
| 4Seal® vs. Starsil® | 3.955 | ** | 0.0030 |
| 4Seal® vs. PerClot® | 2.583 | ns | 0.0591 |
| 4Seal® vs. ARISTA™ | 13.75 | **** | <0.0001 |
| 4Seal® vs. SuperClot® | 15.99 | **** | <0.0001 |
| 4Seal® vs. 4DryField® | 4.448 | ** | 0.0012 |
| Starsil® vs. PerClot® | -1.371 | ns | >0.9999 |
| Starsil® vs. ARISTA™ | 9.796 | **** | <0.0001 |
| Starsil® vs. SuperClot® | 12.04 | **** | <0.0001 |
| Starsil® vs. 4DryField® | 0.4930 | ns | >0.9999 |
| PerClot® vs. ARISTA™ | 11.17 | **** | <0.0001 |
| PerClot® vs. SuperClot® | 13.41 | **** | <0.0001 |
| PerClot® vs. 4DryField® | 1.864 | ns | 0.3412 |
| ARISTA™ vs. SuperClot® | 2.242 | ns | 0.1346 |
| ARISTA™ vs. 4DryField® | -9.303 | **** | <0.0001 |
| SuperClot® vs. 4DryField® | -11.54 | **** | <0.0001 |

| **Legend:** | |
| --- | --- |
| **Symbol:** | **p-value:** |
| ns | 0.1234 |
| * | 0.0332 |
| ** | 0.0021 |
| *** | 0.0002 |
| **** | <0.0001 |

**
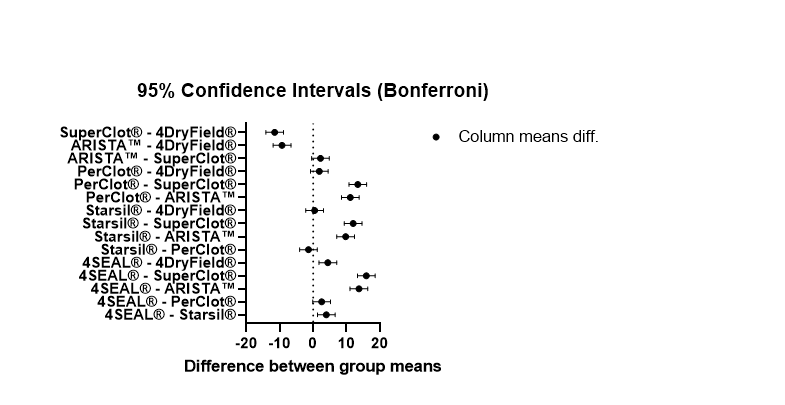
**

Figure S1. Result of one-way ANOVA with Bonferroni's multiple comparisons test for Water Absorption Capacity (WAC).

**Additional information for Water Absorption Rate (WAR)**

Table S4. Results of water absorption rate (WAR) for 0.1 g of hemostatic powders

| **Specimen ▼** | **Water absorption rate (WAR) [mL]** | | |
| --- | --- | --- | --- |
| **Time [s] ►** | **20** | **40** | **60** |
| **4Seal®** | | | |
| 1 | 1.5 | 2.2 | 2.5 |
| 2 | 2.2 | 2.5 | 2.6 |
| 3 | 2.2 | 2.5 | 2.6 |
| Mean | 1.97 | 2.40 | 2.57 |
| Standard Deviation | 0.40 | 0.17 | 0.06 |
| **Starsil®** | | | |
| 1 | 1.8 | 2.1 | 2.2 |
| 2 | 2.1 | 2.6 | 2.7 |
| 3 | 1.9 | 2.3 | 2.4 |
| Mean | 1.93 | 2.33 | 2.43 |
| Standard Deviation | 0.15 | 0.25 | 0.25 |
| **PerClot®** | | | |
| 1 | 0.5 | 0.8 | 1.0 |
| 2 | 0.5 | 0.7 | 0.9 |
| 3 | 0.5 | 0.9 | 1.0 |
| Mean | 0.50 | 0.80 | 0.97 |
| Standard Deviation | 0.00 | 0.10 | 0.06 |
| **ARISTA™** | | | |
| 1 | 0.6 | 0.9 | 1.0 |
| 2 | 0.6 | 0.9 | 1.0 |
| 3 | 0.5 | 0.7 | 0.8 |
| Mean | 0.57 | 0.83 | 0.93 |
| Standard Deviation | 0.06 | 0.12 | 0.12 |
| **SuperClot®** | | | |
| 1 | 0.5 | 0.6 | 0.7 |
| 2 | 0.3 | 0.5 | 0.5 |
| 3 | 0.3 | 0.4 | 0.5 |
| Mean | 0.37 | 0.50 | 0.57 |
| Standard Deviation | 0.12 | 0.10 | 0.12 |
| **4DryField®** | | | |
| 1 | 1.0 | 1.2 | 1.3 |
| 2 | 0.9 | 1.0 | 1.0 |
| 3 | 1.0 | 1.1 | 1.2 |
| Mean | 0.97 | 1.10 | 1.17 |
| Standard Deviation | 0.06 | 0.10 | 0.15 |

Table S5. Result of two-way ANOVA with Bonferroni's multiple comparisons test for Water Absorption Rate (WAR)

| **Bonferroni's multiple comparisons test** | **Mean Diff.** | **Summary** | **Adjusted P Value** |
| --- | --- | --- | --- |
| **20 s** | | | |
| 4Seal® vs. Starsil® | 0.03333 | ns | >0.9999 |
| 4Seal® vs. PerClot® | 1.467 | **** | <0.0001 |
| 4Seal® vs. ARISTA™ | 1.400 | **** | <0.0001 |
| 4Seal® vs. SuperClot® | 1.600 | **** | <0.0001 |
| 4Seal® vs. 4DryField® | 1.000 | **** | <0.0001 |
| Starsil® vs. PerClot® | 1.433 | **** | <0.0001 |
| Starsil® vs. ARISTA™ | 1.367 | **** | <0.0001 |
| Starsil® vs. SuperClot® | 1.567 | **** | <0.0001 |
| Starsil® vs. 4DryField® | 0.9667 | **** | <0.0001 |
| PerClot® vs. ARISTA™ | -0.06667 | ns | >0.9999 |
| PerClot® vs. SuperClot® | 0.1333 | ns | >0.9999 |
| PerClot® vs. 4DryField® | -0.4667 | * | 0.0159 |
| ARISTA™ vs. SuperClot® | 0.2000 | ns | >0.9999 |
| ARISTA™ vs. 4DryField® | 0.4000 | ns | 0.0636 |
| SuperClot® vs. 4DryField® | -0.6000 | *** | 0.0008 |
| **40 s** | | | |
| 4Seal® vs. Starsil® | 0.06667 | ns | >0.9999 |
| 4Seal® vs. PerClot® | 1.600 | **** | <0.0001 |
| 4Seal® vs. ARISTA™ | 1.567 | **** | <0.0001 |
| 4Seal® vs. SuperClot® | 1.900 | **** | <0.0001 |
| 4Seal® vs. 4DryField® | 1.300 | **** | <0.0001 |
| Starsil® vs. PerClot® | 1.533 | **** | <0.0001 |
| Starsil® vs. ARISTA™ | 1.500 | **** | <0.0001 |
| Starsil® vs. SuperClot® | 1.833 | **** | <0.0001 |
| Starsil® vs. 4DryField® | 1.233 | **** | <0.0001 |
| PerClot® vs. ARISTA™ | -0.03333 | ns | >0.9999 |
| PerClot® vs. SuperClot® | 0.3000 | ns | 0.4197 |
| PerClot® vs. 4DryField® | -0.3000 | ns | 0.4197 |
| ARISTA™ vs. SuperClot® | 0.3333 | ns | 0.2306 |
| ARISTA™ vs. 4DryField® | -0.2667 | ns | 0.7379 |
| SuperClot® vs. 4DryField® | -0.6000 | *** | 0.0008 |
| **60 s** | | | |
| 4Seal® vs. Starsil® | 0.1333 | ns | >0.9999 |
| 4Seal® vs. PerClot® | 1.600 | **** | <0.0001 |
| 4Seal® vs. ARISTA™ | 1.633 | **** | <0.0001 |
| 4Seal® vs. SuperClot® | 2.000 | **** | <0.0001 |
| 4Seal® vs. 4DryField® | 1.400 | **** | <0.0001 |
| Starsil® vs. PerClot® | 1.467 | **** | <0.0001 |
| Starsil® vs. ARISTA™ | 1.500 | **** | <0.0001 |
| Starsil® vs. SuperClot® | 1.867 | **** | <0.0001 |
| Starsil® vs. 4DryField® | 1.267 | **** | <0.0001 |
| PerClot® vs. ARISTA™ | 0.03333 | ns | >0.9999 |
| PerClot® vs. SuperClot® | 0.4000 | ns | 0.0636 |
| PerClot® vs. 4DryField® | -0.2000 | ns | >0.9999 |
| ARISTA™ vs. SuperClot® | 0..3667 | ns | 0.1228 |
| ARISTA™ vs. 4DryField® | -0.2333 | ns | >0.9999 |
| SuperClot® vs. 4DryField® | -0.6000 | *** | 0.0008 |

| **Legend:** | |
| --- | --- |
| **symbol:** | **p-value:** |
| ns | 0.1234 |
| * | 0.0332 |
| ** | 0.0021 |
| *** | 0.0002 |
| **** | <0.0001 |


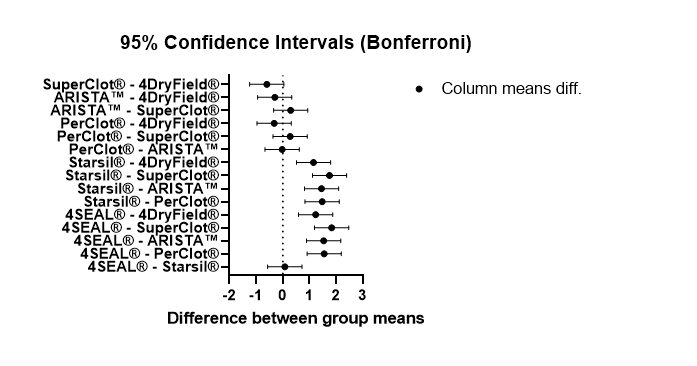


Figure S2. Result of two-way ANOVA with Bonferroni's multiple comparisons test for Water Absorption Rate (WAR).

**Additional information for Adhesion potential**

Table S6. Results of adhesion of hemostatic powders

| Specimen | Force [N] | | | | | |
| --- | --- | --- | --- | --- | --- | --- |
| **4SEAL®** | **Starsil®** | **PerClot®** | **ARISTA™** | **SuperClot®** | **4DryField®** |
| 1 | 0.39 | 0.30 | 0.09 | 0.05 | 0.05 | 0.10 |
| 2 | 0.35 | 0.29 | 0.11 | 0.05 | 0.05 | 0.09 |
| 3 | 0.32 | 0.25 | 0.09 | 0.05 | 0.05 | 0.09 |
| Mean | 0.353 | 0.280 | 0.097 | 0.05 | 0.05 | 0.093 |
| Standard Deviation | 0.035 | 0.027 | 0.012 | 0.000 | 0.000 | 0.006 |

Table S7. Result of one-way ANOVA with Bonferroni's multiple comparisons test for Adhesion potential

| **Bonferroni's multiple comparisons test** | **Mean Diff.** | **Summary** | **Adjusted P Value** |
| --- | --- | --- | --- |
| 4Seal® vs. Starsil® | 0.07333 | ** | 0.0065 |
| 4Seal® vs. PerClot® | 0.2567 | **** | <0.0001 |
| 4Seal® vs. ARISTA™ | 0.3033 | **** | <0.0001 |
| 4Seal® vs. SuperClot® | 0.3033 | **** | <0.0001 |
| 4Seal® vs. 4DryField® | 0.26 | **** | <0.0001 |
| Starsil® vs. PerClot® | 0.1833 | **** | <0.0001 |
| Starsil® vs. ARISTA™ | 0.23 | **** | <0.0001 |
| Starsil® vs. SuperClot® | 0.23 | **** | <0.0001 |
| Starsil® vs. 4DryField® | 0.1867 | **** | <0.0001 |
| PerClot® vs. ARISTA™ | 0.04667 | ns | 0.1499 |
| PerClot® vs. SuperClot® | 0.04667 | ns | 0.1499 |
| PerClot® vs. 4DryField® | 0.003333 | ns | >0.9999 |
| ARISTA™ vs. SuperClot® | 0 | ns | >0.9999 |
| ARISTA™ vs. 4DryField® | -0.04333 | ns | 0.2248 |
| SuperClot® vs. 4DryField® | -0.04333 | ns | 0.2248 |

| **Legend:** | |
| --- | --- |
| **symbol** | **p-value:** |
| ns | 0.1234 |
| * | 0.0332 |
| ** | 0.0021 |
| *** | 0.0002 |
| **** | <0.0001 |


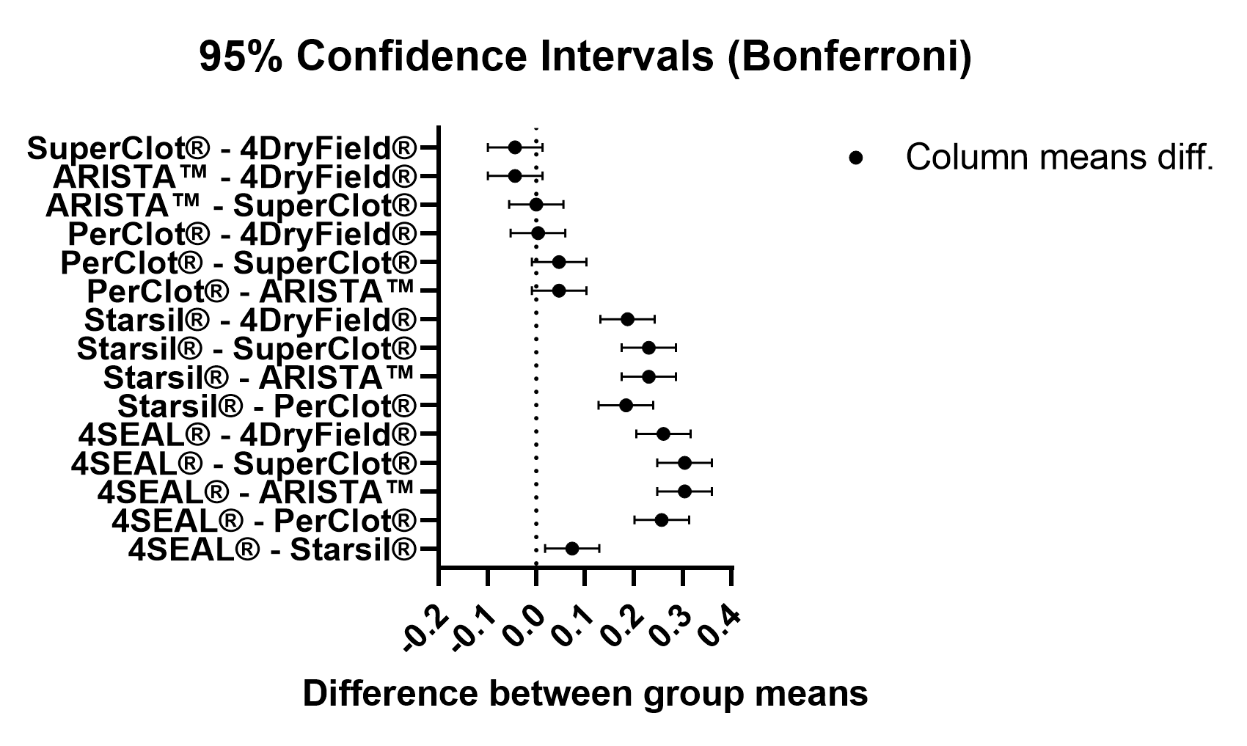


Figure S3. Result of one-way ANOVA with Bonferroni's multiple comparisons test for Adhesion potential

***HEMOSTATIC POWDERS***

Table S8. Information about hemostatic powders

| **Name** | **Manufacturer** | **REF** | **LOT** |
| --- | --- | --- | --- |
| 4SEAL® | Grena Biomed Ltd. | 1203-HP005 | Z/210505 |
| Starsil® | Hemostat Manufacturing GmbH | SS005 | H190001 |
| PerClot® | CryoLife, Inc. | STA0001 | 180303 |
| ARISTA™ | BD, Inc. | SM0002-USA | 6111801 |
| SuperClot® | AMP | SC0003 | 200502 |
| 4DryField® | PlantTec Medical | SK0005-EU | 200101 |


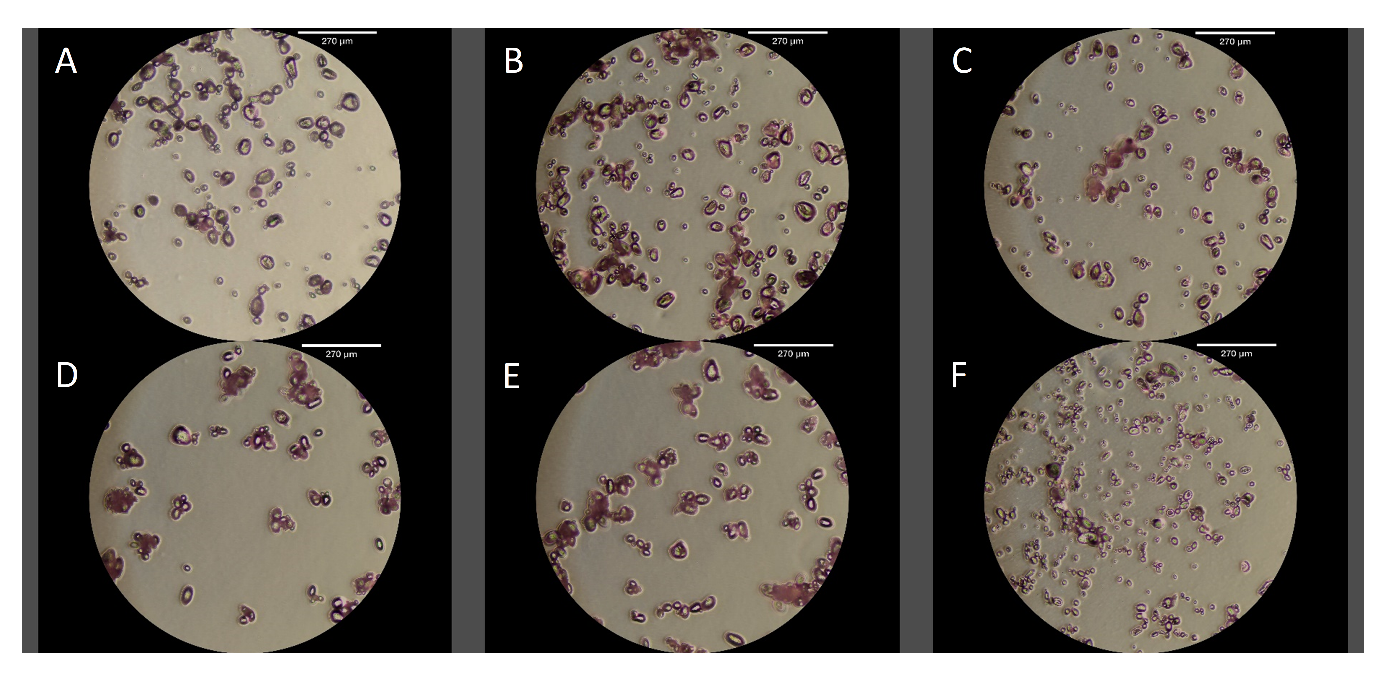


Figure S4. Morphology of evaluated hemostats. A - 4DryField, B - 4Seal, C - Arista, D - PerClot, E - SuperClot, F – Starsil. Images were taken using Revolve Microscope (ECHO A BICO COMPANY, USA) and ECHO Pro ver. 6.4.2 software at 100 x magnification.
